# Supplementary material
Source: Springer Nature journal article supplement (https://www.springermedizin.de/resource/supplementary/12992_2011_144_MOESM3_ESM.pdf/9616564)
Supplement: MOESM3 [file 9616564]

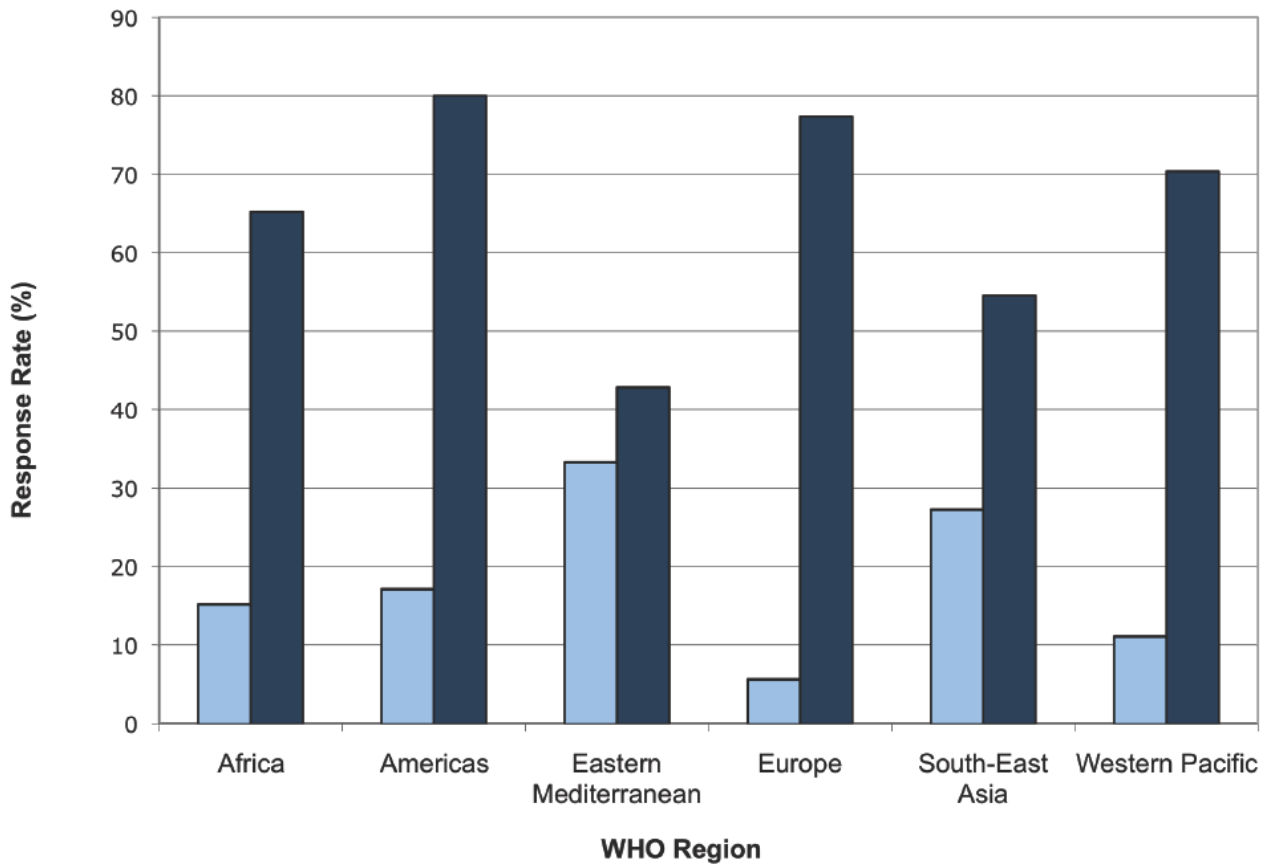

■ Qualitative sample   ■ Quantitative sample

**Africa   Americas   Eastern Mediterranean   Europe   South-East Asia   Western Pacific   Overall**

**Qualitative Survey**   7/46 (15%)   6/35 (17%)   7/21 (33%)   3/53 (6%)   3/11 (27%)   3/27 (11%)   **29/193 (15%)**

**Quantitative Survey**   30/46 (65%)   28/35 (80%)   9/21 (43%)   41/53 (77%)   6/11 (55%)   19/27 (70%)   **133/193 (69%)**
